# Supplementary material for: High-performance solid-state hybrid supercapacitor enabled by metal–organic framework-derived multi-component hybrid electrodes of Co–N–C nanofibers and Co2−xFexP–N–C micropillars
Source: Royal Society of Chemistry journal article supplement (doi:10.1039/d0ta06348g), 2020-01-01
Supplement: d0ta06348g1.pdf [file d0ta06348g1.pdf]

## Electronic Supplementary Information (ESI)

### **High-performance solid-state hybrid supercapacitor enabled by metal-organic framework-derived multi-component hybrid electrodes of Co-N-C nanofibers and Co<sub>2-x</sub>Fe<sub>x</sub>P-N-C micropillars**

Thangjam Ibomcha Singh,<sup>a,b</sup> G. Rajeshkhanna,<sup>c</sup> Tolendra Kshetri,<sup>a</sup> Nam Hoon Kim,<sup>\*a</sup> Joong Hee Lee<sup>\*a,d</sup>

<sup>a</sup>Department of Nano Convergence Engineering, Jeonbuk National University, Jeonju, Jeonbuk, 54896, Republic of Korea.

<sup>b</sup>Faculty of Science, Engineering & Technology, Swinburne University of Technology, PO Box 218, Hawthorn, VIC 3122, Australia.

<sup>c</sup>Department of Chemistry, National Institute of Technology, Warangal, India.

<sup>d</sup>Center for Carbon Composite Materials, Department of Polymer-Nano Science and Technology, Jeonbuk National University, Jeonju, Jeonbuk, 54896, Republic of Korea.

*\*Corresponding author:* [jhl@jbnu.ac.kr](mailto:jhl@jbnu.ac.kr) ; [nhk@jbnu.ac.kr](mailto:nhk@jbnu.ac.kr)

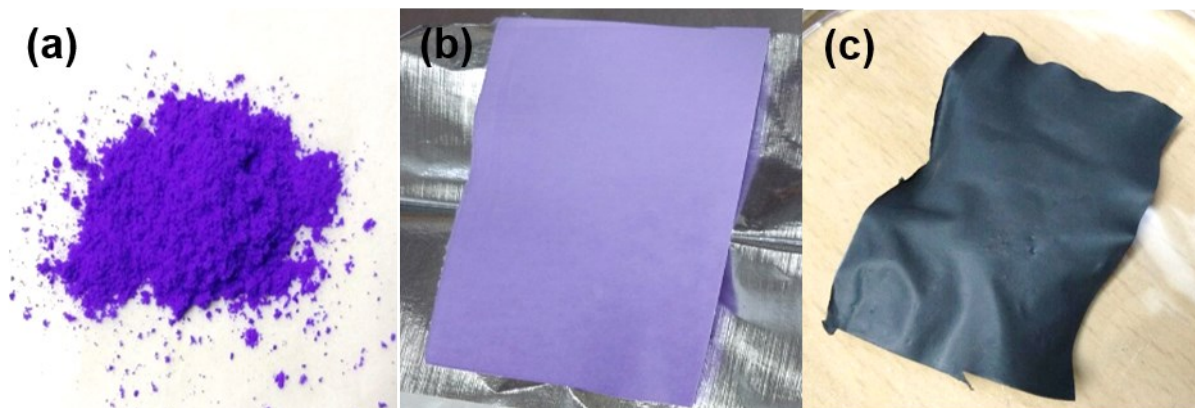

**Fig. S1.** Digital photographs of (a) ZIF-67, (b) electrospun PAN-ZIF-67 nanofiber mat before carbonization (EPZ-67-NFs), (c) electrospun PAN-ZIF-67 nanofiber mat after carbonization (Co-N-CNFs).

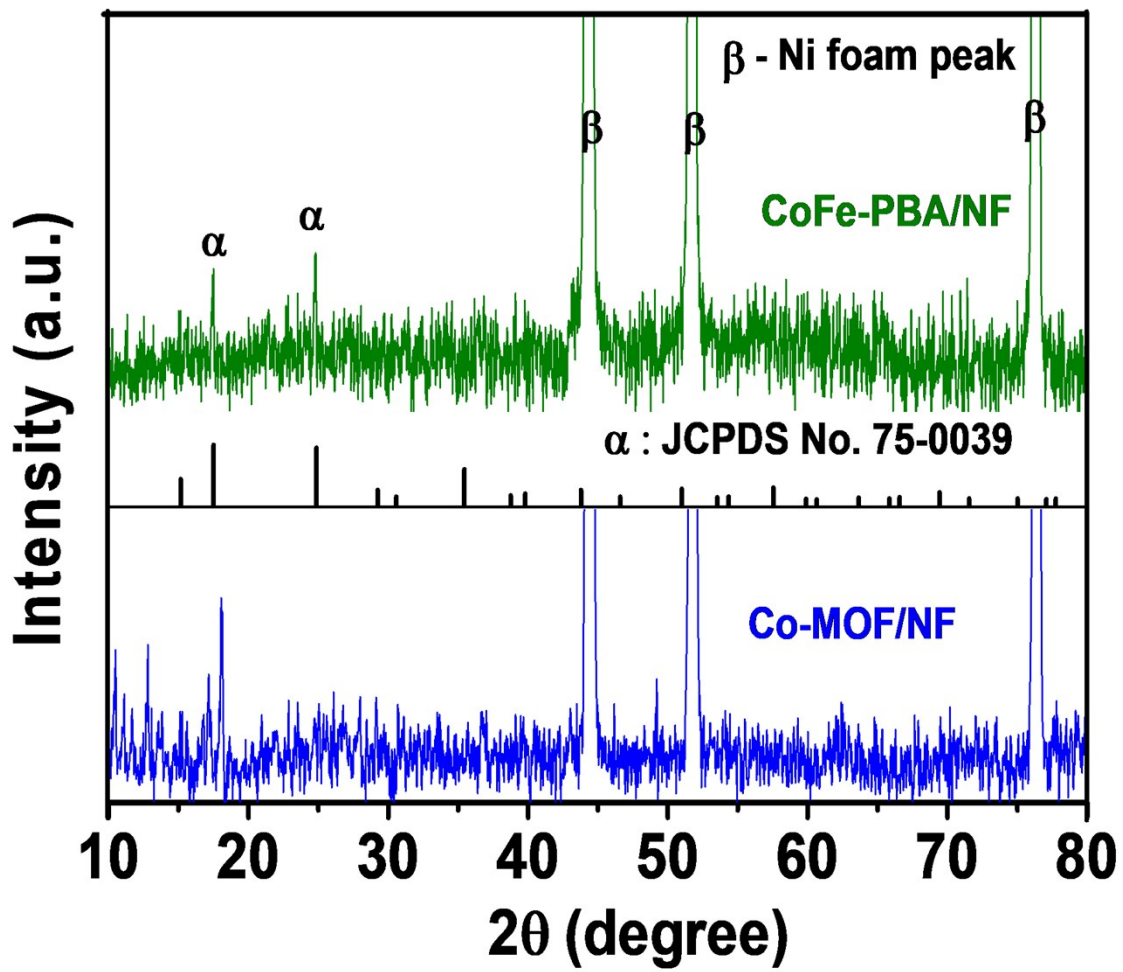

Fig. S2. PXRD patterns of Co-MOF/NF and CoFe-PBA/NF.

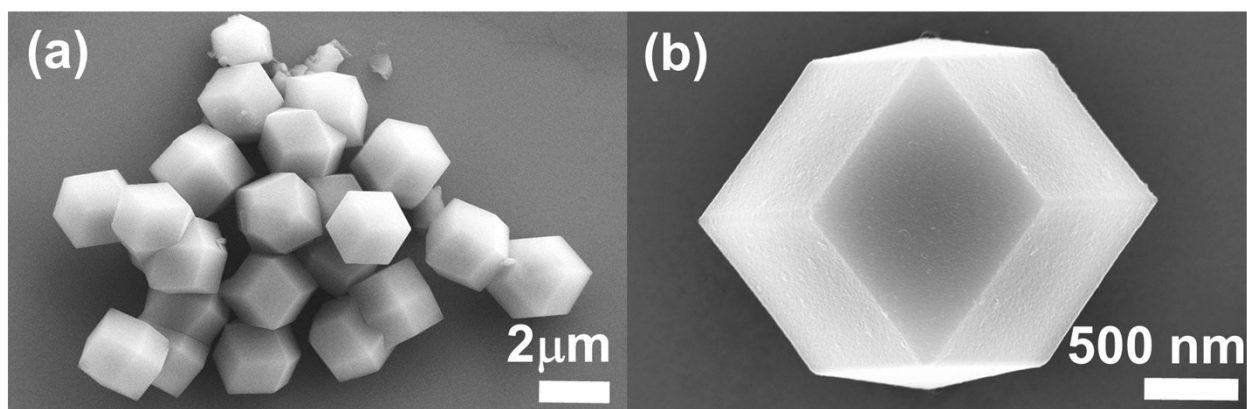

**Fig. S3.** (a and b) Low-and high-magnification FE-SEM images of ZIF-67.

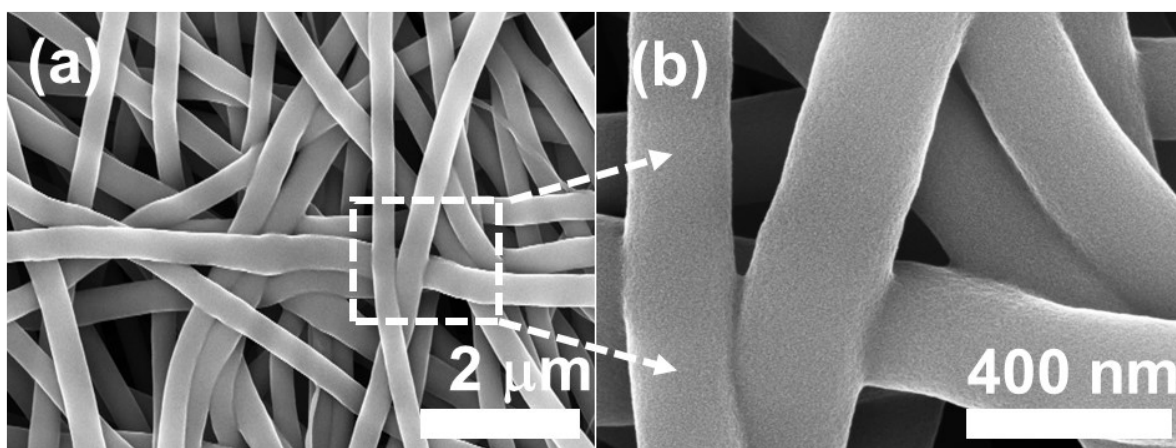

**Fig. S4.** (a and b) Low- and high-magnification FE-SEM images of electrospun PAN nanofibers (EP-NFs).

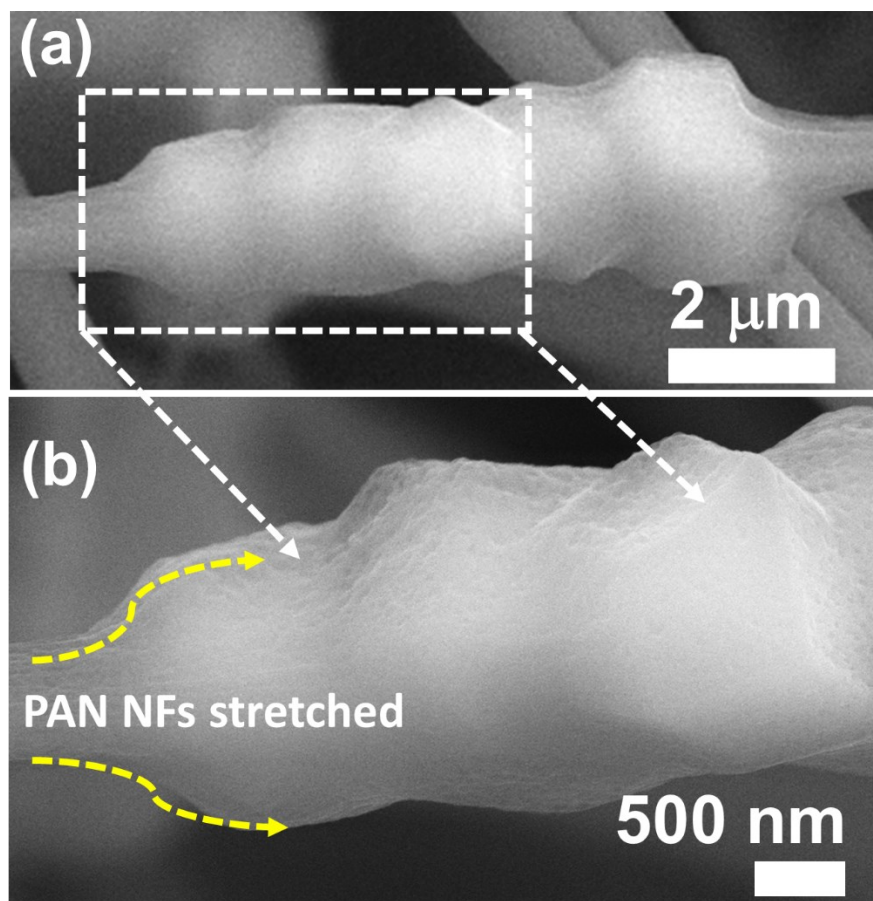

**Fig. S5.** (a and b) Low- and high-magnification FE-SEM images of electrospun PAN-ZIF-67 nanofibers (EPZ-67-NFs) before carbonization showing inclusion of ZIF-67 particles in PAN nanofibers.

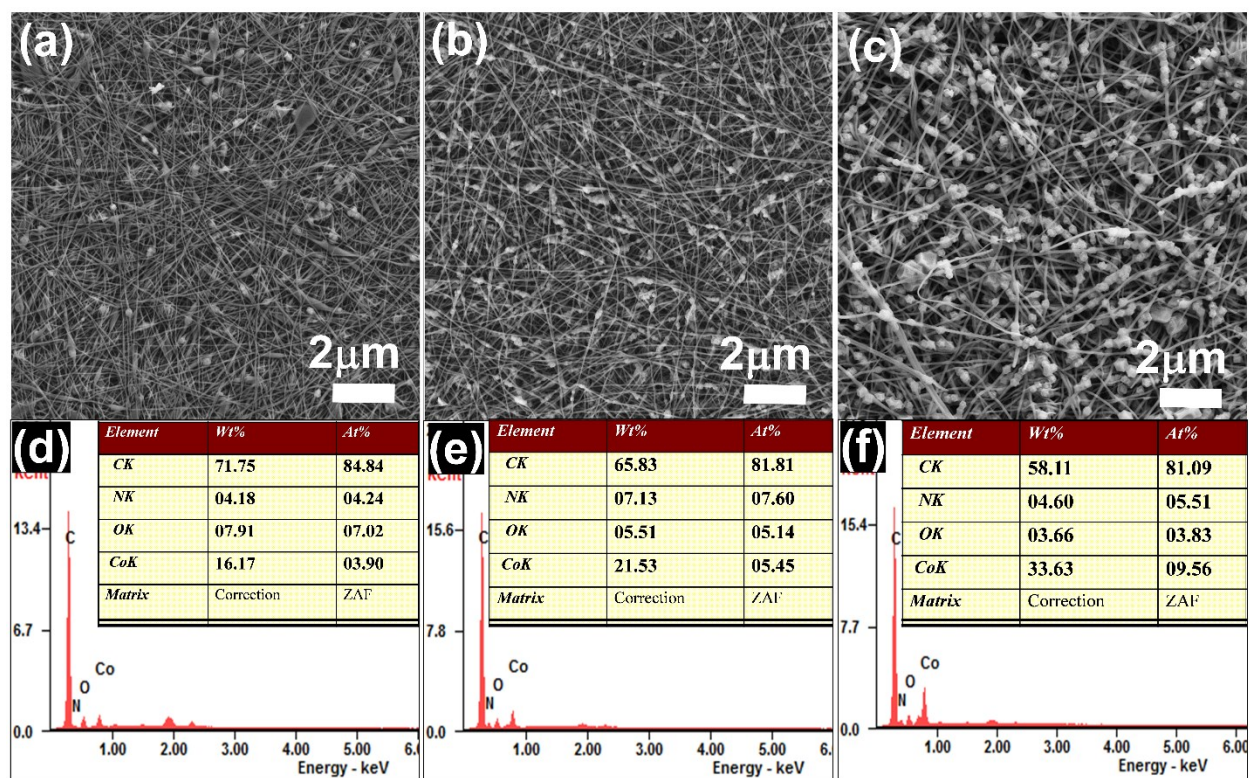

**Fig. S6.** FE-SEM images and corresponding EDS spectra of Co-N-CNFs prepared with PAN and ZIF-67, ZIF-67 to PAN weight ratios used (a and d) 1:10, (b and e) 1:5 and (c and f) 1:3.

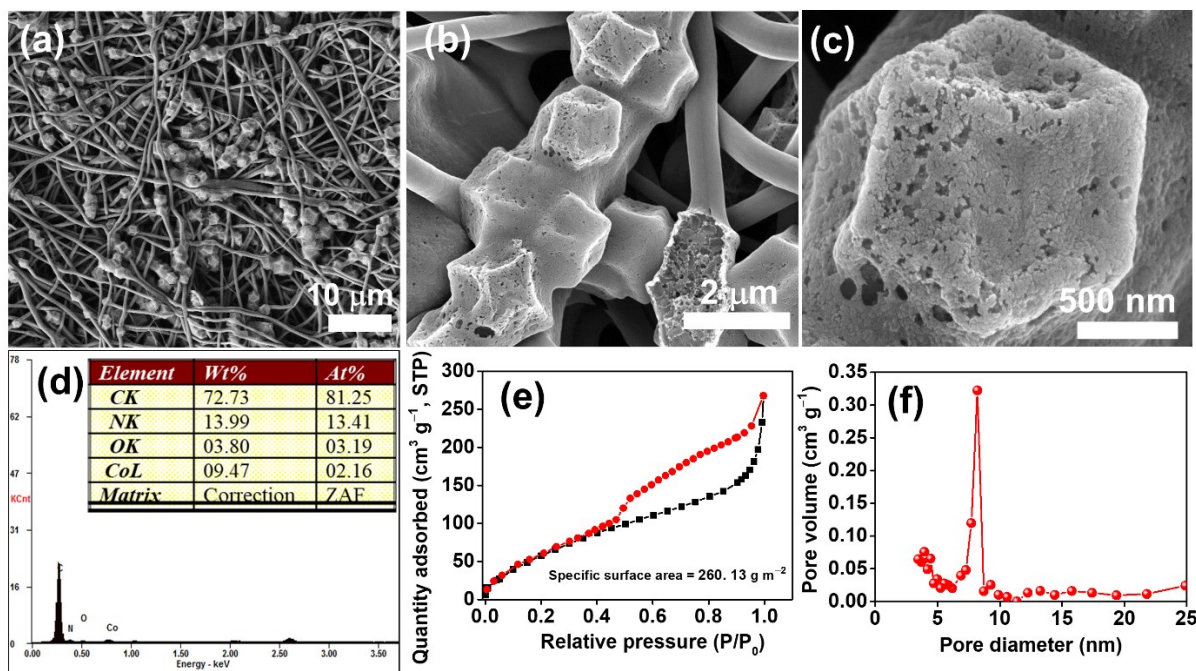

**Fig. S7.** (a-c) FE-SEM images of Co-N-CNFs (acid wash): (a) Low- and (b-c) high-magnification images, (d) EDS spectrum and the elemental composition (inset of d), (e) N<sub>2</sub> sorption isotherm and (f) BJH pore size distribution profiles.



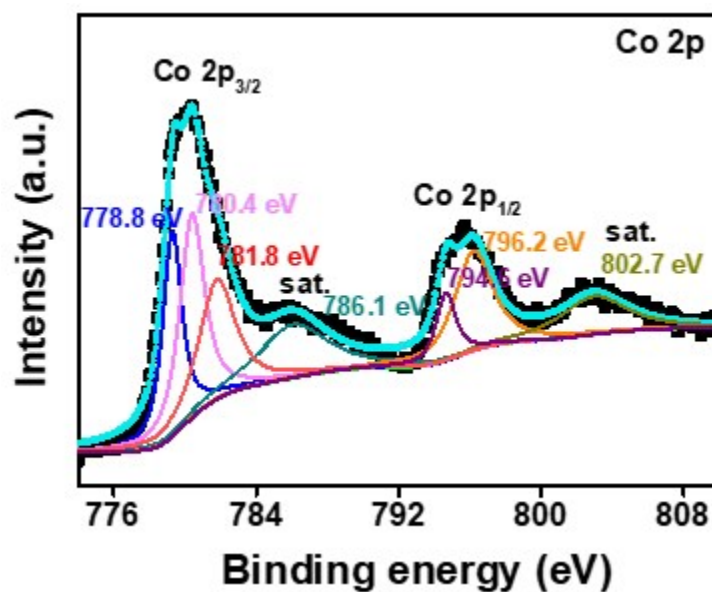

**Fig. S8.** Deconvoluted high-resolution XPS core-spectra of Co 2p for Co-N-CNFs electrode.

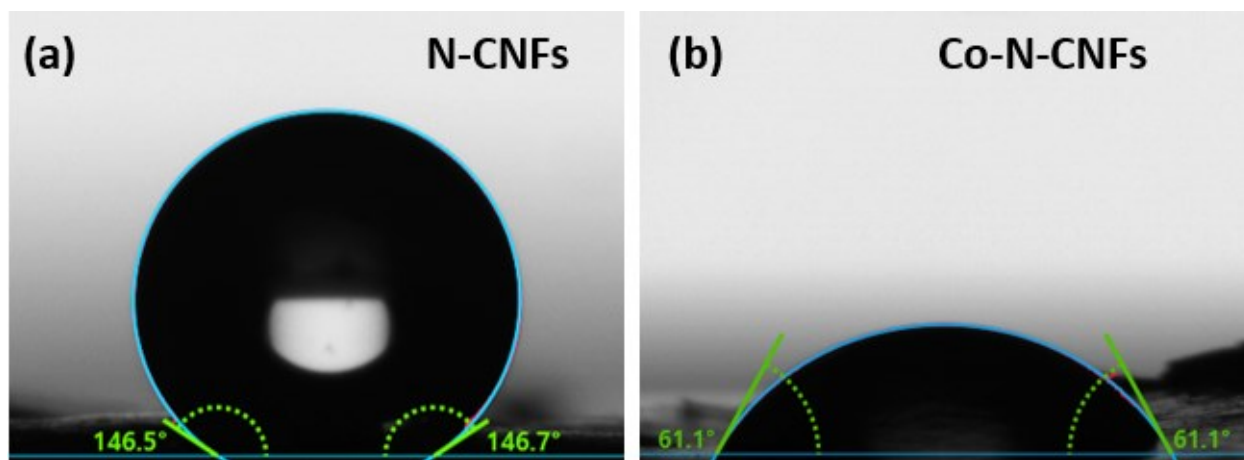

**Fig. S9.** Contact angle measurement of (a) pristine electrospun PAN nanofibers (EP-NFs) derived N-doped carbon nanofiber (N-CNFs) and (b) optimized electrospun PAN-ZIF-67-NFs derived Co-N-CNFs electrode.

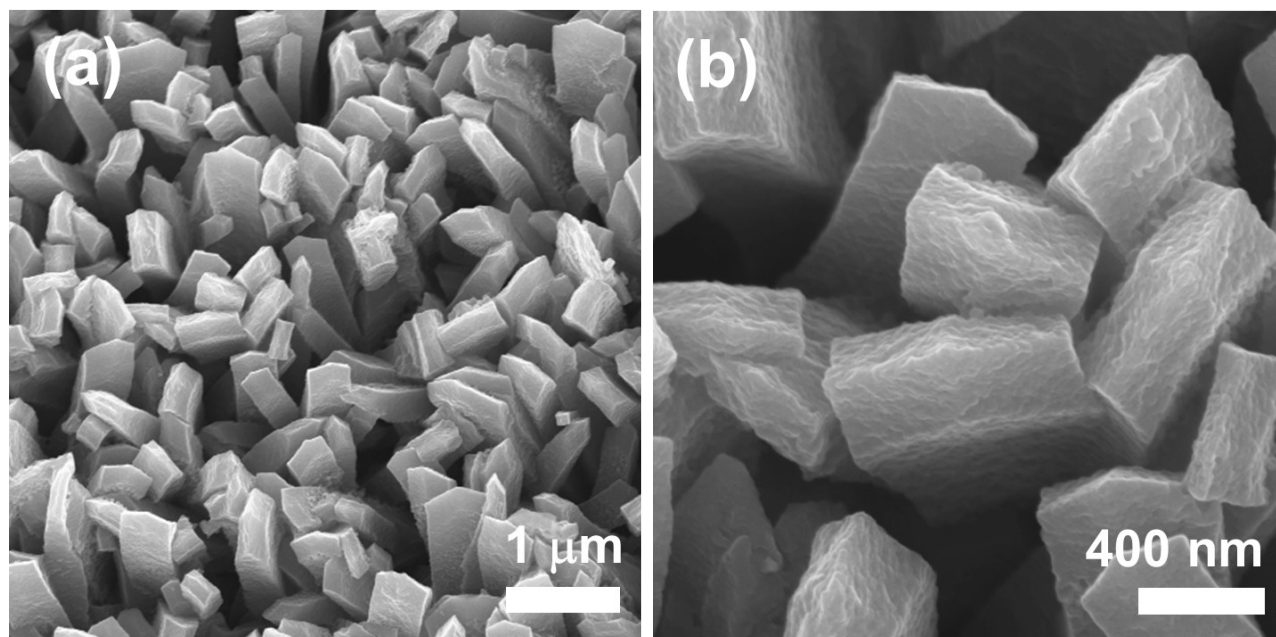

**Fig. S10.** (a and b) Low- and high-magnification FE-SEM images of Co-MOF/NF-derived  $\text{Co}_2\text{P}$ -N-C/NF micro-pillar array.

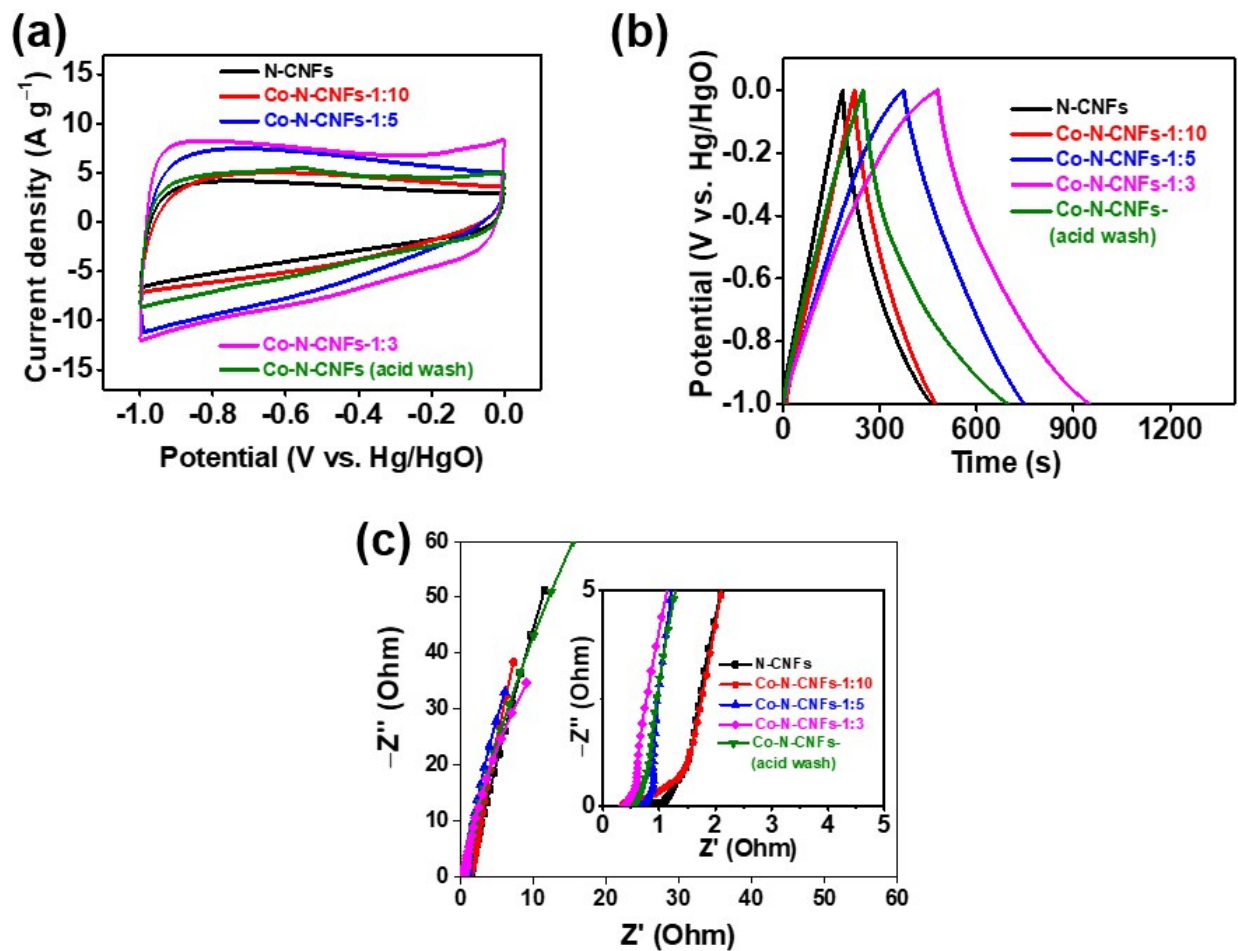

**Fig. S11.** (a) Cyclic voltammograms recorded at a fixed scan rate of  $50 \text{ mV s}^{-1}$ , (b) Galvanostatic charge-discharge (GCD) profiles at a fixed current density of  $0.7 \text{ A g}^{-1}$  and (c) EIS spectra at OCPs in the frequency range  $0.01 - 10^5 \text{ Hz}$  for N-CNFs and Co-N-CNFs of various composition (ZIF-67: PAN-1:10, 1:5, and 1:3) respectively.

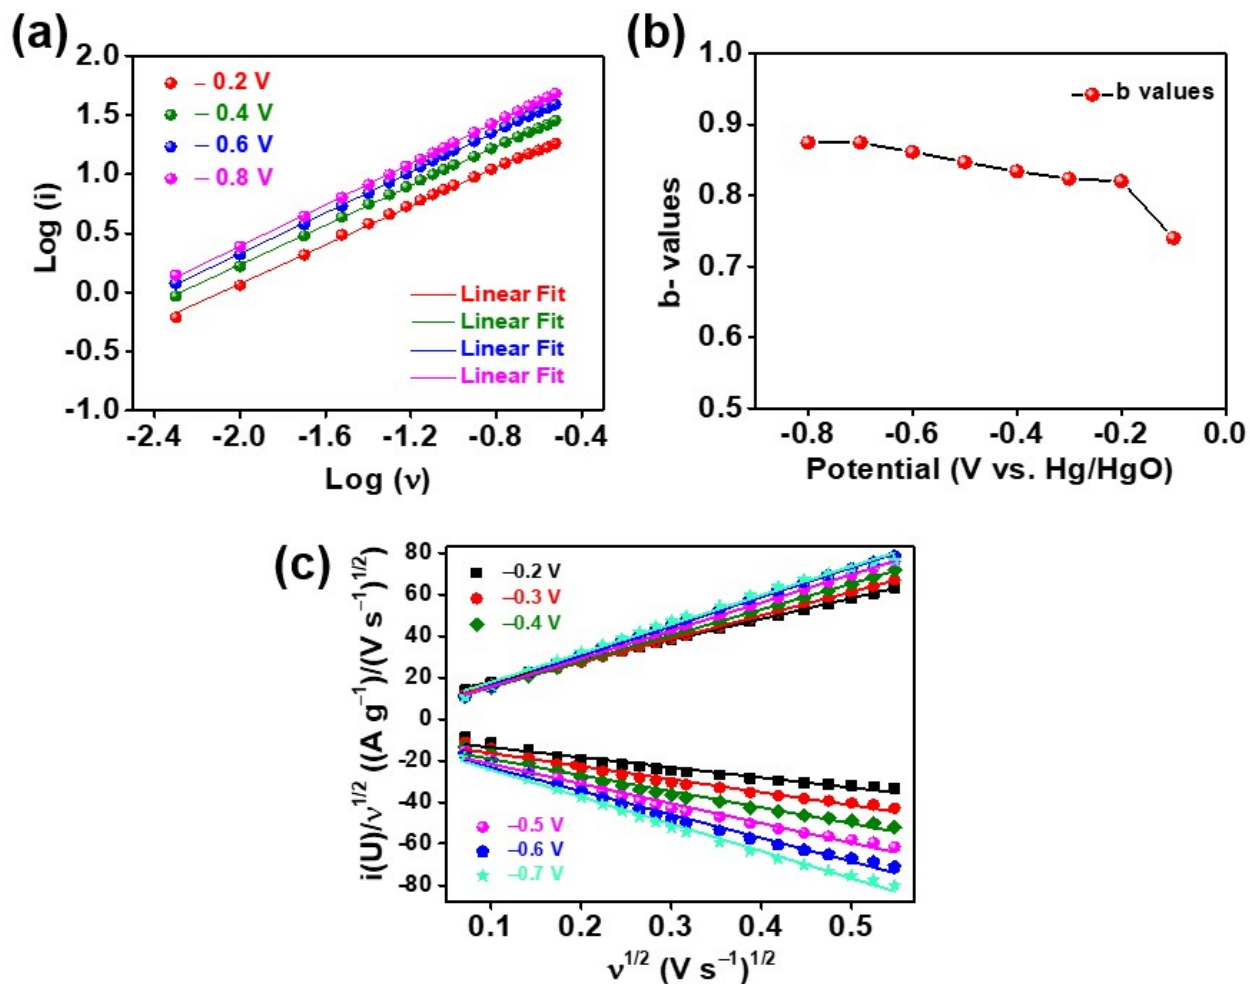

**Fig. S12.** (a) Plot between logarithmic current ( $\log(i)$ ) vs. logarithmic scan rates ( $\log(v)$ ), (b) estimated "b-values" at various potentials, and (c) Plots of  $i(U)/v^{1/2}$  versus  $v^{1/2}$  (both in the anodic and cathodic regions at various potentials) and their respective linear fittings whose slopes and y-intercepts represents the values of  $k_1$  and  $k_2$  respectively.

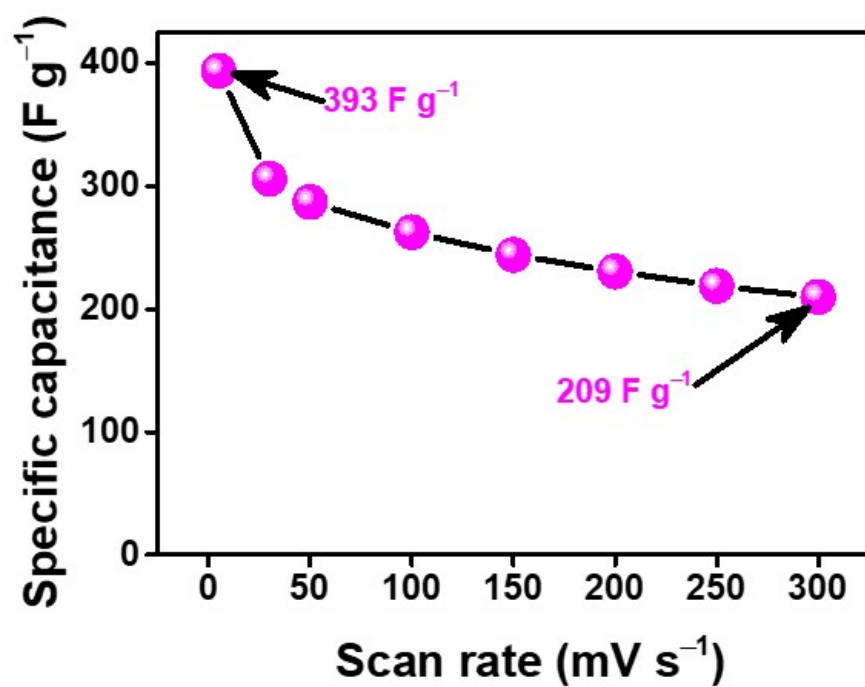

**Fig. S13.** Specific capacitance of Co-N-CNFs calculated from CV curves at various scan rates, from 5 mV s<sup>-1</sup> to 300 mV s<sup>-1</sup>.

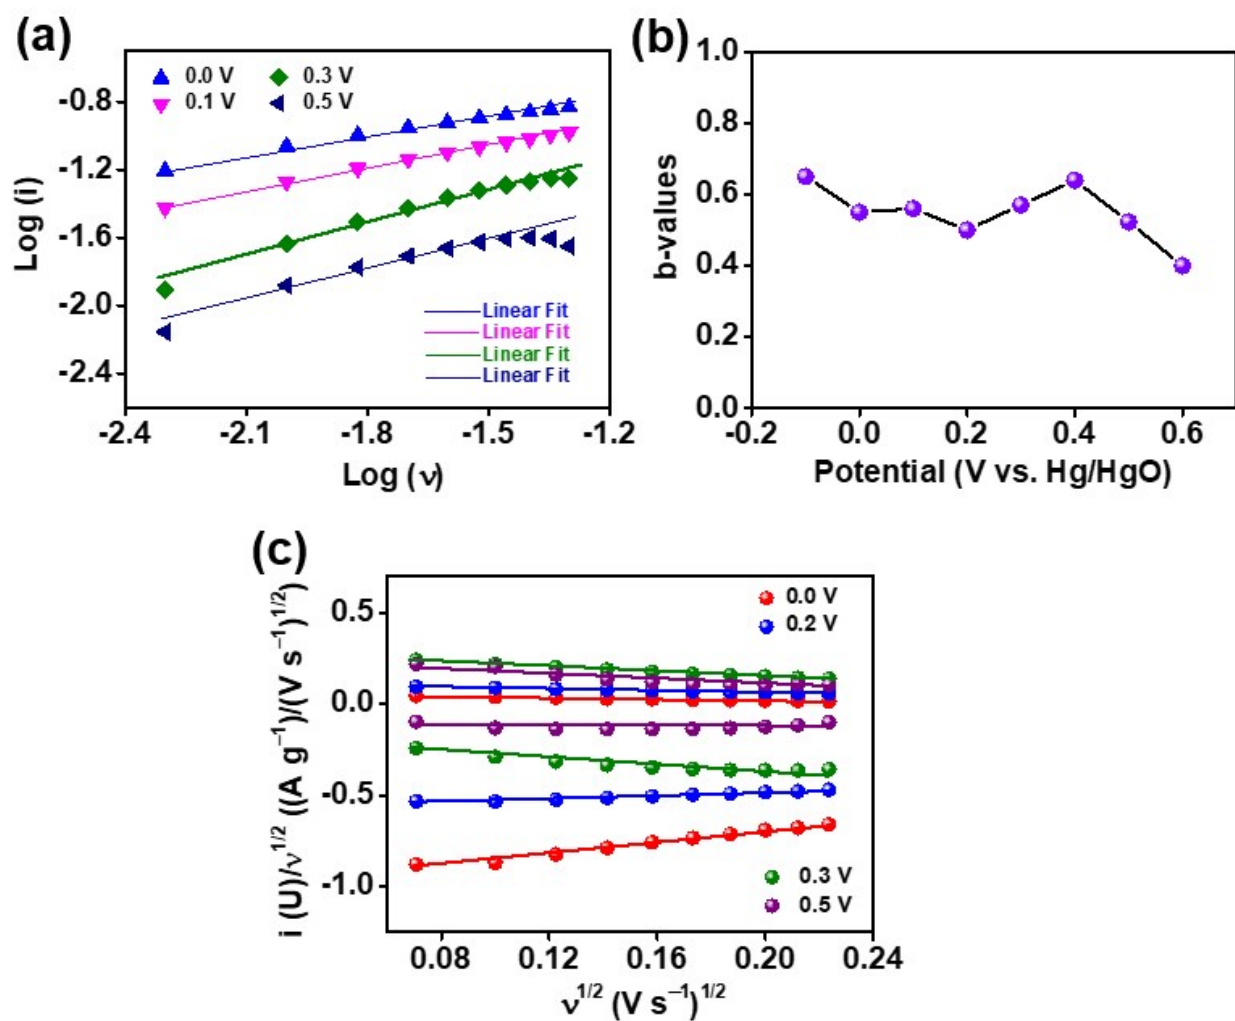

**Fig. S14.** (a) Plot between logarithmic current ( $\log(i)$ ) vs. logarithmic scan rates ( $\log(v)$ ), (b) estimated “b-values” at various potentials, and (c) Plots of  $i(U)/v^{1/2}$  versus  $v^{1/2}$  (both in the anodic and cathodic regions at various potentials) and their respective linear fittings whose slopes and y-intercepts represents the values of  $k_1$  and  $k_2$  respectively.

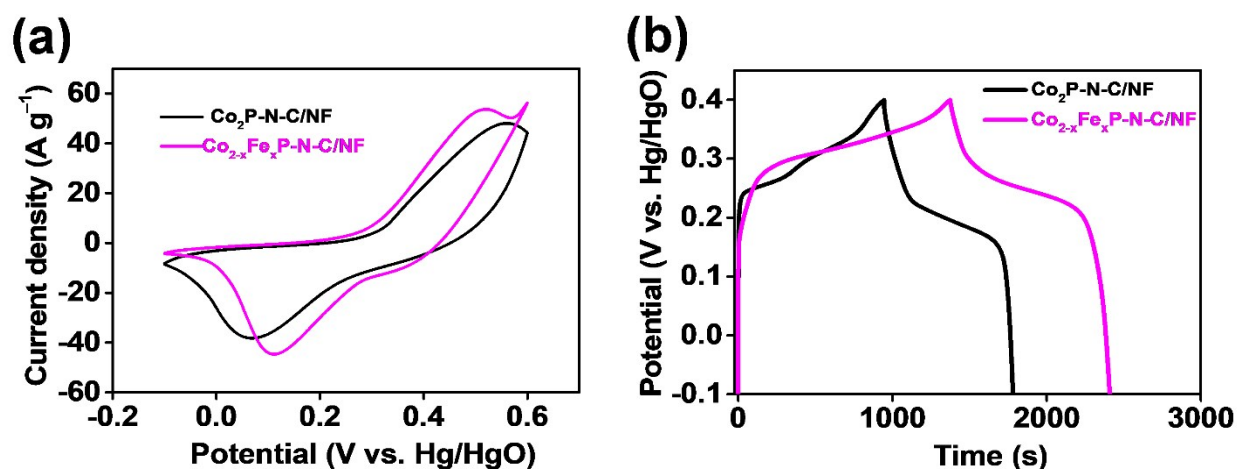

**Fig. S15.** Electrochemical analysis of Co-MOF/NF-derived  $\text{Co}_2\text{P-N-C/NF}$  electrode and CoFe-PBA/NF-derived  $\text{Co}_{2-x}\text{Fe}_x\text{P-N-C/NF}$  electrode (a) CV profiles recorded at  $25 \text{ mV s}^{-1}$  scan rate, and (b) GCD profiles recorded at  $1 \text{ A g}^{-1}$  current density.

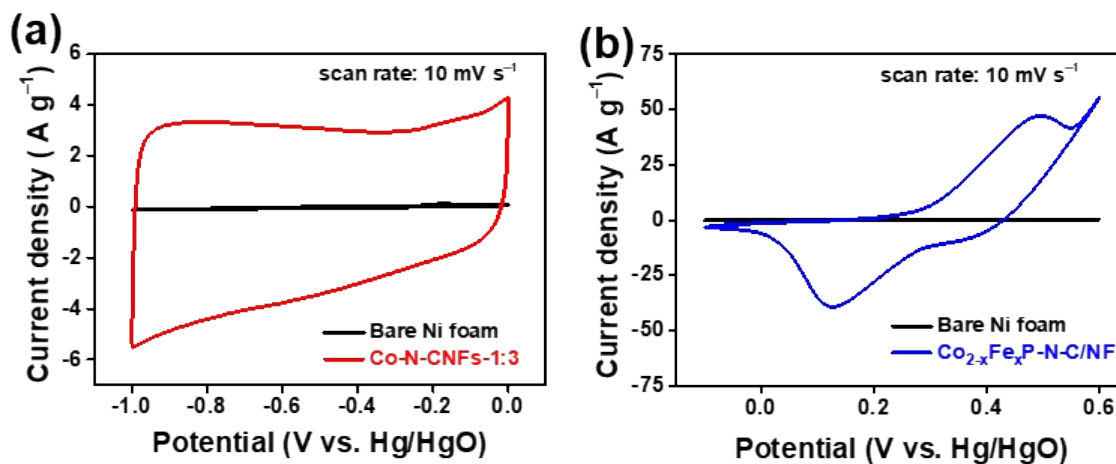

**Fig. S16.** CV profiles at the scan rate of  $10 \text{ mV s}^{-1}$  for bare Ni foam substrate in comparison to (a) Co-N-CNFs and (b)  $\text{Co}_{2-x}\text{Fe}_x\text{P-N-C/NF}$  electrode.

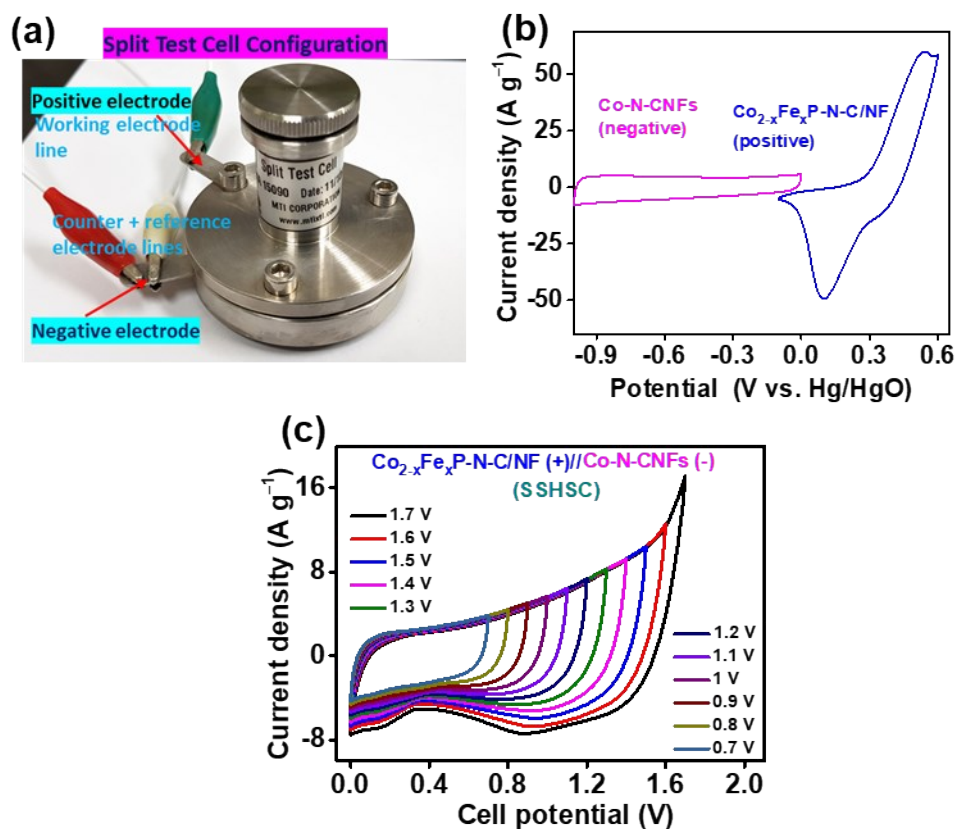

**Fig. S17.** a) Photographic image of hybrid supercapacitor fabricated using split test cell in which  $\text{Co}_{2-x}\text{Fe}_x\text{P-N-C/NF}$  positive and  $\text{Co-N-CNFs}$  negative electrodes are separated by a cellulose paper dipped in a PVA/KOH solid-gel electrolyte; (b) Combined half-cell CV profiles (scan rate:  $20 \text{ mV s}^{-1}$ ) of  $\text{Co-N-CNFs}$  and  $\text{Co}_{2-x}\text{Fe}_x\text{P-N-C/NF}$  electrodes, and (c) CV profiles of the fabricated  $\text{Co}_{2-x}\text{Fe}_x\text{P-N-C/NF (+)//Co-N-CNFs (-)}$  solid state hybrid supercapacitor (SSHSC) device at a fixed scan rate of  $50 \text{ mV s}^{-1}$  showing the potential window extension upto  $1.7 \text{ V}$  respectively.



**Table S1.** Comparison of average sheet resistance between N-CNFs and Co-N-CNFs for ten measurements by four-point-probe surface resistivity meter.

| <b>Sample</b> | <b>No. of measurement</b> | <b>Average Sheet resistance (<math>\Omega/\text{sq.}</math>)</b> |
|---------------|---------------------------|------------------------------------------------------------------|
| N-CNFs        | 10                        | 77.42                                                            |
| Co-N-CNFs     | 10                        | 54.64                                                            |

**Table S2.** The details of calculation of the specific capacitances at various current densities for the negative electrode (Co-N-CNFs) using equation (2), and corresponding to Fig. 5e-f.

| <b>Current (I)<br/>(mA)</b> | <b>Mass (m)<br/>(mg)</b> | <b>Current density ( I/m )<br/>(A g<sup>-1</sup>)</b> | <b><math>\int Udt</math><br/>( V s )</b> | <b><math>(\Delta U)^2</math><br/>( V<sup>2</sup>)</b> | <b><math>C_{sc} = \frac{2I\int Udt}{m(\Delta U)^2}</math><br/>( F g<sup>-1</sup>)</b> |
|-----------------------------|--------------------------|-------------------------------------------------------|------------------------------------------|-------------------------------------------------------|---------------------------------------------------------------------------------------|
| 1                           | 3                        | 0.3                                                   | 633.3                                    | 1                                                     | 380                                                                                   |
| 2                           |                          | 0.7                                                   | 229.3                                    |                                                       | 321                                                                                   |
| 3                           |                          | 1                                                     | 140                                      |                                                       | 280                                                                                   |
| 4                           |                          | 1.3                                                   | 96.1                                     |                                                       | 250                                                                                   |
| 10                          |                          | 3.3                                                   | 33.8                                     |                                                       | 223                                                                                   |
| 15                          |                          | 5                                                     | 21.8                                     |                                                       | 218                                                                                   |
| 30                          |                          | 10                                                    | 10.3                                     |                                                       | 205                                                                                   |
| 45                          |                          | 15                                                    | 6.8                                      |                                                       | 203                                                                                   |
| 60                          |                          | 20                                                    | 5                                        |                                                       | 200                                                                                   |

**Table S3.** The details of calculation of the specific capacities at various current densities for the  $\text{Co}_{2-x}\text{Fe}_x\text{P-N-C/NF}$  positive electrode using equation (4), and corresponding to Fig. 6d-e.

| <b>Current (I)<br/>(mA)</b> | <b>Mass (m)<br/>(mg)</b> | <b>Current density (<br/>I/m )<br/>(A g<sup>-1</sup>)</b> | <b><math>\int Udt</math><br/>(V s)</b> | <b>Potential<br/>window (<math>\Delta U</math>)<br/>(V)</b> | <b><math>C_s = \frac{2I\int Udt}{m\Delta U}</math><br/>(mA h g<sup>-1</sup>)</b> |
|-----------------------------|--------------------------|-----------------------------------------------------------|----------------------------------------|-------------------------------------------------------------|----------------------------------------------------------------------------------|
| 2                           | 2                        | 1                                                         | 310.50                                 | 0.5                                                         | 345                                                                              |
| 3                           |                          | 1.5                                                       | 205.20                                 |                                                             | 342                                                                              |
| 4                           |                          | 2                                                         | 151.65                                 |                                                             | 337                                                                              |
| 5                           |                          | 2.5                                                       | 120.24                                 |                                                             | 334                                                                              |
| 6                           |                          | 3                                                         | 99                                     |                                                             | 330                                                                              |
| 8                           |                          | 4                                                         | 72.45                                  |                                                             | 322                                                                              |
| 10                          |                          | 5                                                         | 55.98                                  |                                                             | 311                                                                              |
| 20                          |                          | 10                                                        | 24.57                                  |                                                             | 273                                                                              |
| 30                          |                          | 15                                                        | 14.70                                  |                                                             | 245                                                                              |
| 40                          |                          | 20                                                        | 9.94                                   |                                                             | 221                                                                              |
| 50                          |                          | 25                                                        | 7.56                                   |                                                             | 210                                                                              |

**Table S4.** Electrochemical performance comparison of Co-N-CNFs electrode material with other recent negative electrode materials.

| Electrode material                     | Electrolyte                        | Current density                             | Specific capacitance (F g <sup>-1</sup> ) | GCD cycles@ current density  | Capacitance retention [Coulombic efficiency] | References       |
|----------------------------------------|------------------------------------|---------------------------------------------|-------------------------------------------|------------------------------|----------------------------------------------|------------------|
| <b>Co-N-CNFs</b>                       | 6 M KOH                            | 0.3 A g <sup>-1</sup> ; 1 A g <sup>-1</sup> | 380 ; 280                                 | 10,000 @10 A g <sup>-1</sup> | 97 % [99.8%]                                 | <b>This work</b> |
| NPCF                                   | 1 M H <sub>2</sub> SO <sub>4</sub> | 1 A g <sup>-1</sup>                         | 332                                       | 5,000 @1 A g <sup>-1</sup>   | 98.9 % [NA]                                  | 1                |
| NCF/graphene                           | 6 M KOH                            | 1 A g <sup>-1</sup>                         | 183                                       | 4,500 @1 A g <sup>-1</sup>   | 92 % [NA]                                    | 2                |
| Carbon-ZS                              | 6 M KOH                            | 0.1 A g <sup>-1</sup>                       | 285.8                                     | 1,000 @10 A g <sup>-1</sup>  | 98.8% [NA]                                   | 3                |
| N-doped OMC                            | 1 M H <sub>2</sub> SO <sub>4</sub> | 0.2 A g <sup>-1</sup>                       | 308                                       | 2,000 @ 2 A g <sup>-1</sup>  | -                                            | 4                |
| Nano porous carbon (NPC)               | 6 M KOH                            | 2 mv s <sup>-1</sup>                        | 272                                       | 1,000 @ 8 A g <sup>-1</sup>  | -                                            | 5                |
| HPCNFs-N                               | 2 M H <sub>2</sub> SO <sub>4</sub> | 1 A g <sup>-1</sup>                         | 307.2                                     | 10,000 @5 A g <sup>-1</sup>  | 98.2 % [NA]                                  | 6                |
| Defect-enriched graphene block (DGB)   | 6 M KOH                            | 1 A g <sup>-1</sup>                         | 235                                       | 10,000 @10 A g <sup>-1</sup> | 100% [NA]                                    | 7                |
| HPNCs/CS                               | 6 M KOH                            | 1 A g <sup>-1</sup>                         | 280                                       | -                            | -                                            | 8                |
| 3D-G/PANI                              | 1 M H <sub>2</sub> SO <sub>4</sub> | 1 A g <sup>-1</sup>                         | 777                                       | 60,000 @5 A g <sup>-1</sup>  | 85 % [NA]                                    | 9                |
| GQD embedded activated carbons (GEACS) | 6 M KOH                            | 1 A g <sup>-1</sup>                         | 388                                       | 10,000 @10 A g <sup>-1</sup> | -                                            | 10               |

**Table S5.** Electrochemical performance comparison of  $\text{Co}_{2-x}\text{Fe}_x\text{P-N-C/NF}$  electrode materials

with other recent battery-type electrode materials.

| Electrode material                                            | Electrolyte        | Current density ( $\text{A g}^{-1}/\text{mA cm}^{-2}$ ) | Specific capacity ( $\text{mA h g}^{-1}$ ) | GCD cycles@ current density      | Capacity retention [Coulombic efficiency] | References       |
|---------------------------------------------------------------|--------------------|---------------------------------------------------------|--------------------------------------------|----------------------------------|-------------------------------------------|------------------|
| <b><math>\text{Co}_{2-x}\text{Fe}_x\text{P-N-C/NF}</math></b> | 6 M KOH            | $1 \text{ A g}^{-1}$                                    | $345 \text{ mA h g}^{-1}$                  | 10,000 @ $20 \text{ A g}^{-1}$   | 86 % [99.5%]                              | <b>This work</b> |
| NiCoP@NF                                                      |                    | $1 \text{ A g}^{-1}$                                    | $2143 \text{ F g}^{-1}$                    | 2,000 @ $10 \text{ A g}^{-1}$    | 73%                                       | 11               |
| Zn-Ni-P NS                                                    | 2 M KOH            | $2 \text{ mA cm}^{-2}$                                  | $384 \text{ mA h g}^{-1}$                  | 10,000 @ $15 \text{ mA cm}^{-2}$ | 96 % -                                    | 12               |
| Ni-MOF                                                        | 3 M KOH            | $1 \text{ A g}^{-1}$                                    | $123 \text{ mA h g}^{-1}$                  | 3000 @ $10 \text{ A g}^{-1}$     | 88.6%                                     | 13               |
| Co(P,S)/CC                                                    | 6 M KOH            | $1 \text{ A g}^{-1}$                                    | $295.8 \text{ mA h g}^{-1}$                | 10,000 @ $10 \text{ A g}^{-1}$   | 99%                                       | 14               |
| $\text{Co}_2\text{P}$ nanoflower                              | 6 M KOH            | $1 \text{ A g}^{-1}$                                    | $416 \text{ F g}^{-1}$                     | -                                | -                                         | 15               |
| $\text{Ni}_2\text{P}$                                         | 2 M KOH            | $1 \text{ A g}^{-1}$                                    | $843.25 \text{ F g}^{-1}$                  | 1000@ $1 \text{ A g}^{-1}$       | No obvious change                         | 16               |
| NiCoP                                                         | 6 M KOH            | $1 \text{ A g}^{-1}$                                    | $571 \text{ C g}^{-1}$                     | 3000@ $8 \text{ A g}^{-1}$       | 71.8%                                     | 17               |
| Ni-P@NiCo <sub>2</sub> O <sub>4</sub>                         | 6 M KOH+0.7 M LiOH | $1 \text{ A g}^{-1}$                                    | $1240 \text{ F g}^{-1}$                    | -                                | -                                         | 18               |
| $\text{Ni}_2\text{P}@5\%\text{GR}$                            | 3 M KOH            | $1 \text{ A g}^{-1}$                                    | $672.4 \text{ F g}^{-1}$                   | 2000@ $1 \text{ A g}^{-1}$       | ~29.74 % [~99%]                           | 19               |
| NiCoP nanoplates                                              | 1 M KOH            | $1 \text{ A g}^{-1}$                                    | $194 \text{ mA h g}^{-1}$                  | 5000@ $10 \text{ A g}^{-1}$      | 81%                                       | 20               |

**Table S6.** Electrochemical performance comparison of our Fe<sub>x</sub>Co<sub>2-x</sub>P-N-C/NF (+)//Co-N-CNFs (-) SSHSC with other hybrid/asymmetric supercapacitors.

| Device electrode materials (Positive//Negative)                                                                             | Electrolyte                         | Current density (A g <sup>-1</sup> ) | Specific capacity (mA h g <sup>-1</sup> ) | Energy density@ power density                           | GCD cycles@ current density    | Capacity retention [Coulombic efficiency] | Ref.             |
|-----------------------------------------------------------------------------------------------------------------------------|-------------------------------------|--------------------------------------|-------------------------------------------|---------------------------------------------------------|--------------------------------|-------------------------------------------|------------------|
| Co <sub>2-x</sub> Fe <sub>x</sub> P-N-C/NF//Co-N-CNFs                                                                       | PVA/KOH                             | 1 Ag <sup>-1</sup>                   | 104                                       | 84.72 W h Kg <sup>-1</sup> @ 706 W k g <sup>-1</sup>    | 10,000 @ 10 A g <sup>-1</sup>  | 93 % [99.6 %]                             | <b>This work</b> |
| NiCoP/C//activated carbon                                                                                                   | 2 M KOH                             | 1 Ag <sup>-1</sup>                   | 214.5 C g <sup>-1</sup>                   | 47.6 W h Kg <sup>-1</sup> @798.9 W k g <sup>-1</sup>    | 10,000 @ 10 A g <sup>-1</sup>  | 78.1% -                                   | 21               |
| Co <sub>3</sub> O <sub>4</sub> //carbon                                                                                     | 6 KOH                               | 2 Ag <sup>-1</sup>                   | 101 F g <sup>-1</sup>                     | 36 W h Kg <sup>-1</sup> @1600 W k g <sup>-1</sup>       | 2,000 @ 5 A g <sup>-1</sup>    | 89% -                                     | 22               |
| HPNCs/CS//HPNCs/CS                                                                                                          | 1 M Na <sub>2</sub> SO <sub>4</sub> | 0.5 Ag <sup>-1</sup>                 |                                           | 16.2 W h kg <sup>-1</sup> @ 0.45 k Wkg <sup>-1</sup>    | 10,000@ 0.5 A g <sup>-1</sup>  | 89 % [NA]                                 | 8                |
| MOXC-700// Nano porous carbon (NPC)                                                                                         | 6 KOH                               | 0.5 Ag <sup>-1</sup>                 | 202.5                                     | 17.496 Wh kg <sup>-1</sup> @ 388.8 W kg <sup>-1</sup>   | 10,000@ A g <sup>-1</sup>      | >80% -                                    | 5                |
| Co <sub>2</sub> P nanoflowers//graphene                                                                                     | 6 KOH                               | 0.4 Ag <sup>-1</sup>                 | 76.8 F g <sup>-1</sup>                    | 8.8 Wh kg <sup>-1</sup> @6 kW kg <sup>-1</sup>          | 6000 @ 0.8 A g <sup>-1</sup>   | 97% -                                     | 15               |
| Ni <sub>2</sub> P//Fe <sub>2</sub> O <sub>3</sub>                                                                           | 2 M KOH                             | 0.5 Ag <sup>-1</sup>                 | 100 F g <sup>-1</sup>                     | 35.5 Wh kg <sup>-1</sup> @400 W kg <sup>-1</sup>        | 1000@10 mA cm <sup>-2</sup>    | 96 % -                                    | 16               |
| NiCoP//AC                                                                                                                   | 6 M KOH                             | 0.5Ag <sup>-1</sup>                  | 164 C g <sup>-1</sup>                     | 32Wh kg <sup>-1</sup> @351W kg <sup>-1</sup>            | 3000@                          | 91.8% -                                   | 17               |
| Ni-P@NiCo <sub>2</sub> O <sub>4</sub> //AC                                                                                  | 6 M KOH and 0.7 M LiOH              | 1 Ag <sup>-1</sup>                   | 77                                        | 21Wh kg <sup>-1</sup> @350W kg <sup>-1</sup>            | 10,000@4 mA cm <sup>-2</sup>   | 78.3% -                                   | 18               |
| NiCoP nanoplates// graphene films                                                                                           | 1 M KOH                             | 2 A g <sup>-1</sup>                  | 43.8 mAh g <sup>-1</sup>                  | 32.9 Wh kg <sup>-1</sup> @ 1301 W kg <sup>-1</sup>      | 5000 @ 20 A g <sup>-1</sup>    | 83% -                                     | 20               |
| NSCGH//AC                                                                                                                   | 2 M KOH                             |                                      | -                                         | 21.1Whkg <sup>-1</sup> @ 300 W kg <sup>-1</sup>         | 10 000@                        | 87.42% -                                  | 23               |
| 1T-Mn <sub>x</sub> Mo <sub>1-x</sub> S <sub>2-y</sub> Se <sub>y</sub> // MoFe <sub>2</sub> S <sub>4-z</sub> Se <sub>z</sub> | PVA/KOH                             | 3 mA cm <sup>-2</sup>                | 91 mA h g <sup>-1</sup>                   | 69 Wh kg <sup>-1</sup> @ 0.985 kW kg <sup>-1</sup>      | 10,000@ 50 mA cm <sup>-2</sup> | 83.5% -                                   | 24               |
| Ni <sub>3-x</sub> Co <sub>x</sub> S <sub>4</sub> //AC                                                                       | 6 M KOH                             | -                                    | -                                         | 55.05 Wh kg <sup>-1</sup> @14155.71 W k g <sup>-1</sup> | 5000@ 10 A g <sup>-1</sup>     | 87.71% -                                  | 25               |
| CoP/C//N-doped carbon shells                                                                                                | 2 M KOH                             | 1 A g <sup>-1</sup>                  | 59.3 F g <sup>-1</sup>                    | 16.14 Wh kg <sup>-1</sup> @700 W kg <sup>-1</sup>       | 5000 @ 7 A g <sup>-1</sup>     | 99.5% -                                   | 26               |
| 3DPC/Co <sub>3</sub> O <sub>4</sub> //AC                                                                                    | 3M KOH                              | 1 A g <sup>-1</sup>                  | 60.76 F g <sup>-1</sup>                   | 21.1 Wh kg <sup>-1</sup> @ 790 W kg <sup>-1</sup> .     | - -                            | - -                                       | 27               |
| MoS <sub>2</sub> /Ti <sub>3</sub> C <sub>2</sub> //MoS <sub>2</sub> /Ti <sub>3</sub> C <sub>2</sub>                         | PVA-H <sub>2</sub> SO <sub>4</sub>  | 2 mA cm <sup>-2</sup>                | 347 mF cm <sup>-2</sup>                   | 17.4 μWh cm <sup>-2</sup> @ 600 μW cm <sup>-2</sup>     | 20 000@ 30 mA cm <sup>-2</sup> | 91.1%                                     | 28               |
| NiCo <sub>2</sub> S <sub>4</sub> /NF// CNTs@Gr-CNF-5                                                                        | 6 M KOH                             | 1 A g <sup>-1</sup>                  | 218 F g <sup>-1</sup>                     | 62.13 Wh kg <sup>-1</sup> @ 789.66 W kg <sup>-1</sup>   | 10,000 @ 1 A g <sup>-1</sup>   | 94.98%                                    | 29               |

## Reference:

- 1 C. Wang, C. Liu, J. Li, X. Sun, J. Shen, W. Han and L. Wang, *Chem. Commun.*, 2017, **53**, 1751–1754.
- 2 Q. Dong, G. Wang, H. Hu, J. Yang, B. Qian, Z. Ling and J. Qiu, *J. Power Sources*, 2013, **243**, 350–353.
- 3 S. Zhong, C. Zhan and D. Cao, *Carbon N. Y.*, 2015, **85**, 51–59.
- 4 Y. Song, L. Li, Y. Wang, C. Wang, Z. Guo and Y. Xia, *ChemPhysChem*, 2014, **15**, 2084–2093.
- 5 A. Mahmood, R. Zou, Q. Wang, W. Xia, H. Tabassum, B. Qiu and R. Zhao, *ACS Appl. Mater. Interfaces*, 2016, **8**, 2148–2157.
- 6 L.-F. Chen, Y. Lu, L. Yu and X. W. (David) Lou, *Energy Environ. Sci.*, 2017, **10**, 1777–1783.
- 7 Y. Dong, S. Zhang, X. Du, S. Hong, S. Zhao, Y. Chen, X. Chen and H. Song, *Adv. Funct. Mater.*, 2019, **29**, 1–10.
- 8 L. Xin, R. Chen, Q. Liu, J. Liu, Z. Li, R. Li and J. Wang, *New J. Chem.*, 2017, **41**, 12835–12842.
- 9 K. Li, J. Liu, Y. Huang, F. Bu and Y. Xu, *J. Mater. Chem. A*, 2017, **5**, 5466–5474.
- 10 Y. Qing, Y. Jiang, H. Lin, L. Wang, A. Liu, Y. Cao, R. Sheng, Y. Guo, C. Fan, S. Zhang, D. Jia and Z. Fan, *J. Mater. Chem. A*, 2019, **7**, 6021–6027.
- 11 Y. Lan, H. Zhao, Y. Zong, X. Li, Y. Sun, J. Feng, Y. Wang, X. Zheng and Y. Du, *Nanoscale*, 2018, **10**, 11775–11781.
- 12 T. T. Nguyen, J. Balamurugan, N. H. Kim and J. H. Lee, *J. Mater. Chem. A*, 2018, **6**, 8669–8681.
- 13 Y. Jiao, J. Pei, C. Yan, D. Chen, Y. Hu and G. Chen, *J. Mater. Chem. A*, 2016, **4**, 13344–13351.
- 14 A. M. Elshahawy, C. Guan, X. Li, H. Zhang, Y. Hu, H. Wu, S. J. Pennycook and J. Wang, *Nano Energy*, 2017, **39**, 162–171.
- 15 X. Chen, M. Cheng, D. Chen and R. Wang, *ACS Appl. Mater. Interfaces*, 2016, **8**, 3892–3900.
- 16 D. Wang, L.-B. Kong, M.-C. Liu, Y.-C. Luo and L. Kang, *Chem. - A Eur. J.*, 2015, **21**, 17897–17903.
- 17 Y. M. Hu, M. C. Liu, Y. X. Hu, Q. Q. Yang, L. Bin Kong and L. Kang, *Electrochim. Acta*, 2016, **215**, 114–125.
- 18 X. Li, R. Ding, L. Yi, W. Shi, Q. Xu and E. Liu, *Electrochim. Acta*, 2016, **222**, 1169–1175.

- 19 W. Du, S. Wei, K. Zhou, J. Guo, H. Pang and X. Qian, *Mater. Res. Bull.*, 2015, **61**, 333–339.
- 20 H. Liang, C. Xia, Q. Jiang, A. N. Gandi, U. Schwingenschlögl and H. N. Alshareef, *Nano Energy*, 2017, **35**, 331–340.
- 21 Q. Zhou, Y. Gong and K. Tao, *Electrochim. Acta*, 2019, **320**, 134582.
- 22 R. R. Salunkhe, J. Tang, Y. Kamachi, T. Nakato, J. H. Kim and Y. Yamauchi, *ACS Nano*, 2015, **9**, 6288–6296.
- 23 X. Yu, B. Lu and Z. Xu, *Adv. Mater.*, 2014, **26**, 1044–1051.
- 24 U. N. Pan, V. Sharma, T. Kshetri, T. I. Singh, D. R. Paudel, N. H. Kim and J. H. Lee, *Small*, 2020, **16**, 2001691.
- 25 M. Chuai, K. Zhang, X. Chen, Y. Tong, H. Zhang and M. Zhang, *Chem. Eng. J.*, 2020, **381**, 122682.
- 26 X. Zhang, S. Hou, Z. Ding, G. Zhu, H. Tang, Y. Hou, T. Lu and L. Pan, *J. Alloys Compd.*, 2020, **822**, 153578.
- 27 S. Li, K. Yang, P. Ye, K. Ma, Z. Zhang and Q. Huang, *Appl. Surf. Sci.*, 2020, **503**, 144090.
- 28 X. Wang, H. Li, H. Li, S. Lin, W. Ding, X. Zhu, Z. Sheng, H. Wang, X. Zhu and Y. Sun, *Adv. Funct. Mater.*, 2020, **30**, 0190302.
- 29 T. Kshetri, D. T. Tran, D. C. Nguyen, N. H. Kim, K. tak Lau and J. H. Lee, *Chem. Eng. J.*, 2020, **380**, 122543.
